# Supplementary material for: Effect of the General Anaesthetic Ketamine on Electrical and Ca2+ Signal Propagation in Arabidopsis thaliana
Source: MDPI journal article supplement (doi:10.3390/plants13060894), 2024-03-20
Supplement: s1 [file s1]

## SUPPLEMENTARY MATERIAL

### Effect of the general anaesthetic ketamine on electrical and $\text{Ca}^{2+}$ signal propagation in the *Arabidopsis thaliana*.

Andrej Pavlovič<sup>1\*</sup>, Lucie Ševčíková<sup>1</sup>, Martin Hřivňacký<sup>1</sup>, Marek Rác<sup>1</sup>

<sup>1</sup>Department of Biophysics, Faculty of Science, Palacký University, Šlechtitelů 27, CZ-783 71, Olomouc, Czech Republic.

Figure S1 The plants of *Arabidopsis thaliana* 24 h (A) and 15 days (B) after experiments with ketamin application.

Figure S2 Aminoacid alignment of human glutamate receptor NMDA 2A isoform 1 (NP\_000824.1) and *Arabidopsis thaliana* GLR3.3 (NP\_001322169.1) and GLR 3.6 (NP\_001326369.1).

Movie S1 The  $[\text{Ca}^{2+}]_{\text{cyt}}$  signals in transgenic *Arabidopsis thaliana* expressing APOAEQUORIN in response to heat wounding in control plants

Movie S2 The  $[\text{Ca}^{2+}]_{\text{cyt}}$  signals in transgenic *Arabidopsis thaliana* expressing APOAEQUORIN in response to heat wounding in ketamine-treated plants.

Table S1 Primers sequences used in qPCR.

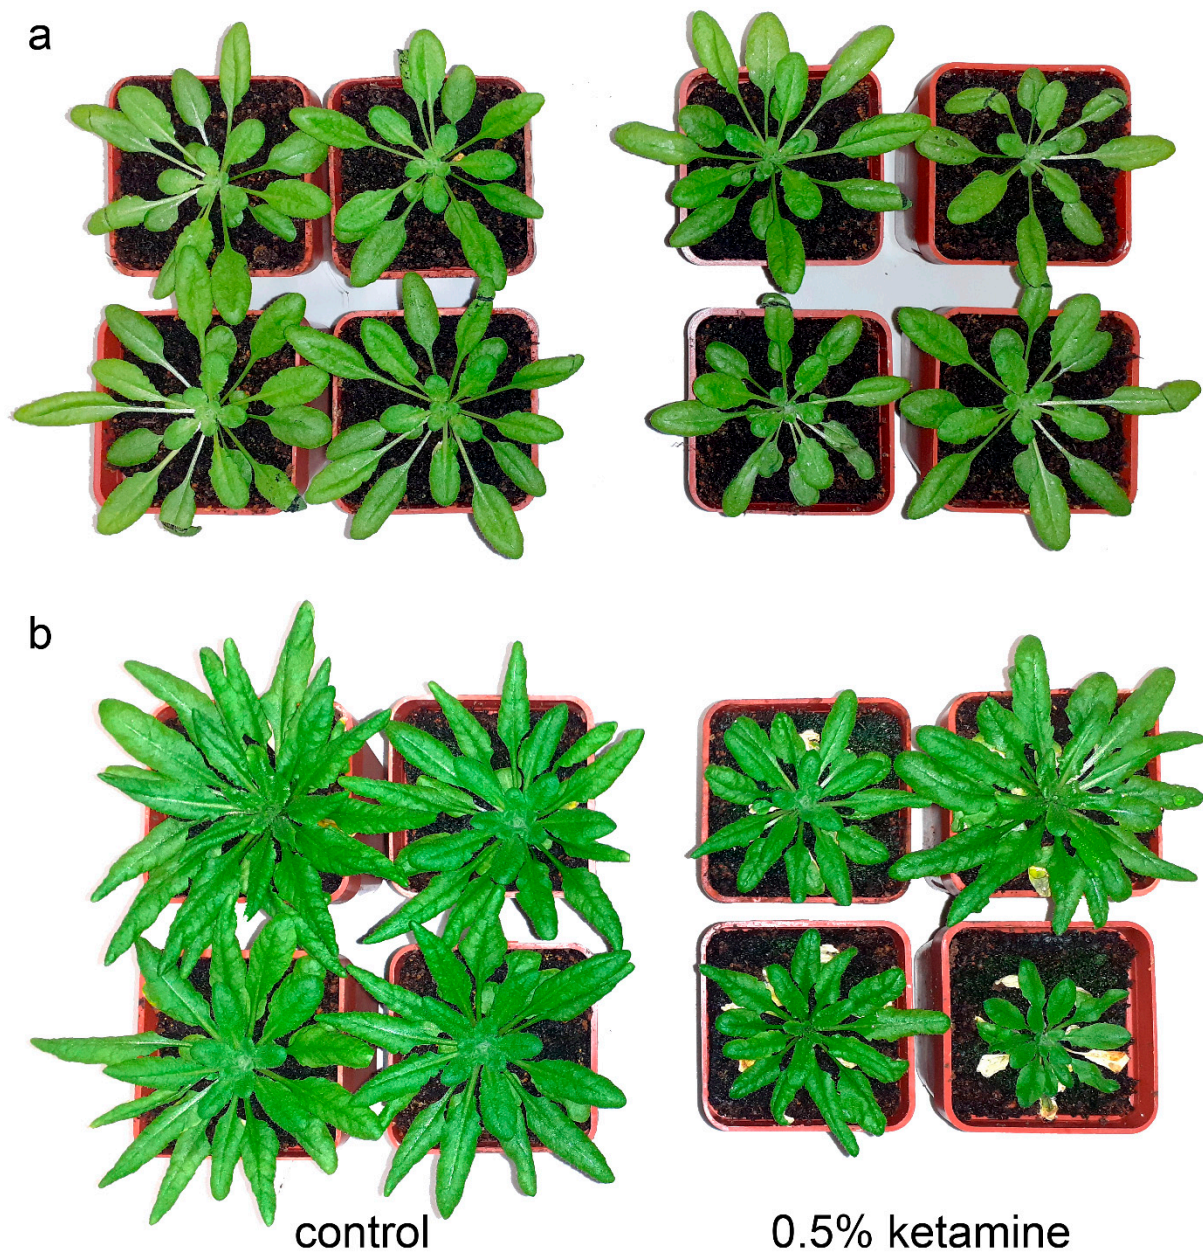

**Figure S1** The plants of *Arabidopsis thaliana* 24 h (A) and 15 days (B) after experiments with ketamin application.

### glutamate receptor 3.3 [*Arabidopsis thaliana*]

Sequence ID: [NP\\_001322169.1](#) Length: 933 Number of Matches: 2

[See 7 more title\(s\)](#) [See all Identical Proteins\(IPG\)](#)

Range 1: 491 to 847 [GenPept](#) [Graphics](#)

[Next Match](#) [Previous Match](#)

| Score          | Expect                                                        | Method                       | Identities  | Positives    | Gaps       |
|----------------|---------------------------------------------------------------|------------------------------|-------------|--------------|------------|
| 84.3 bits(207) | 2e-20                                                         | Compositional matrix adjust. | 84/385(22%) | 165/385(42%) | 34/385(8%) |
| Query 457      | KGFCIDILKKLSRTVKFTYDLYLVTNGKHGKKVNNVWNGMIGEVVYQRAVMAVGS       | LINE                         | 516         |              |            |
| Sbjct 491      | KGFCIDVFTAANNLLPYAVPVKFIPIYG-NGKE-NPSYTHMVEITTNFNGVVDVAIVT    | 548                          |             |              |            |
| Query 517      | ERSEVVDVSPFVETGISVMVSRNGTVSPSAFLPFSASVWMMFVMLLIVSAIAVFVF      | 576                          |             |              |            |
| Sbjct 549      | R+++VDF+ P+ +G+ V+ AFL PF+ +W + L V I V++                     | 607                          |             |              |            |
| Query 577      | EYFSPVGYNNRLAKGKAPHGPSFTIGKAIWLLWGLVFNNNSVPVQNPKGTTSKIMVSVWAF | 636                          |             |              |            |
| Sbjct 608      | E+ R + + P P +W + +F +N T ++++++W F                           | 656                          |             |              |            |
| Query 637      | FAVIFLASYTANLAAFMIQEEFVDQVTGLSDKKFORPHDYSPPFRFGTVPNGSTERNIRN  | 696                          |             |              |            |
| Sbjct 657      | +I +SYTA+L + + ++ + G+ R D ++ G+ E +RN                        | 709                          |             |              |            |
| Query 697      | NYPYMHQYMTKFNQKGVEDALV-SLKTGKLDAFIYDAAVLNKYAGRD---EGCKLVITIG  | 751                          |             |              |            |
| Sbjct 710      | E---LNISESRLVPLGTPEAYAKALDGPSPKGGV-AAIVDERPYVELFLSSNCAYRIVG   | 764                          |             |              |            |
| Query 752      | SGYIFATTGYGIALQKGSPPWKRQIDLALLQFVGDGEMEELETWLWT-GICHNEKNEVMSS | 810                          |             |              |            |
| Sbjct 765      | F +G+G A + SP + A+L+ +G+++ + WL C E E+ S                      | 822                          |             |              |            |
| Query 811      | QLDIDNMAGVFYMLAAAMALSLITF 835                                 |                              |             |              |            |
| Sbjct 823      | +L + + G+F + A L+L +                                          | 847                          |             |              |            |

### glutamate receptor 3.6 [*Arabidopsis thaliana*]

Sequence ID: [NP\\_001326369.1](#) Length: 903 Number of Matches: 1

[See 5 more title\(s\)](#) [See all Identical Proteins\(IPG\)](#)

Range 1: 458 to 837 [GenPept](#) [Graphics](#)

[Next Match](#) [Previous Match](#)

| Score          | Expect                                                        | Method                       | Identities   | Positives    | Gaps        |
|----------------|---------------------------------------------------------------|------------------------------|--------------|--------------|-------------|
| 94.4 bits(233) | 2e-23                                                         | Compositional matrix adjust. | 100/420(24%) | 186/420(44%) | 54/420(12%) |
| Query 430      | VRNTVPCR-KFVKINNSTNEGMNVKKCKKGFCIDILKKLSRTVKFTYDLYLVTNGK-HGK  | 487                          |              |              |             |
| Sbjct 458      | +R VP R +F ++ + + GM GFC+D+ + + LV G H                        | 512                          |              |              |             |
| Query 488      | KVNNVWNGMIGEVVYQRAVMAVGS                                      | 547                          |              |              |             |
| Sbjct 513      | N+ +I VY VG +TI ER+++ DF+ P+VE+G+ V+ S                        | 569                          |              |              |             |
| Query 548      | AFLEPFASVWMMFVMLLIVSAIAVFVFEYFSPVGYNNRLAKGKAPHGPSFTIGKAIWL    | 607                          |              |              |             |
| Sbjct 570      | AFL PF+ +W++ LIV A+ ++ E+ ++ + + P P + W                      | 619                          |              |              |             |
| Query 608      | LWGLVFNNNSVPVQNPKGTTT---KIMVSVWAFFAVIFLASYTANLAAFMIQEEFVDQVTG | 664                          |              |              |             |
| Sbjct 620      | + +F + + TTS +I++ +W F +I +SYTA+L + + + + G                   | 674                          |              |              |             |
| Query 665      | LSDDKKFORPHDYSPPFRFGTVPNGSTERNIRNYPYMHQYMTKFNQ---KGVEDALVSL   | 720                          |              |              |             |
| Sbjct 675      | + + Q HD P + P GS R+ +H+ ++ + E+ +L                           | 721                          |              |              |             |
| Query 721      | KTGKLDAFIYDAAVLNKYAGRD---EGCKLVITIGSGYIFATTGYGIALQKGSPPWKRQID | 776                          |              |              |             |
| Sbjct 722      | + G + AAV++ +A + C+ +G F G+G A + SP +                         | 777                          |              |              |             |
| Query 777      | LALLQFVGDGEMEELETWLWT-GICHNEKNEVMSSQLDIDNMAGVFYMLAAAMALSLITF  | 835                          |              |              |             |
| Sbjct 778      | A+LQ +G+M+ + WL C + E+ +L++ + G+F + A L+L +                   | 837                          |              |              |             |

**Figure S2** Aminoacid alignment of human glutamate receptor NMDA 2A (GluN2A) isoform 1 (NP\_000824.1) and *Arabidopsis thaliana* GLR3.3 (NP\_001322169.1) and GLR 3.6 (NP\_001326369.1). The critical residues involved in ketamine binding (L642, N614) are highlighted in red rectangles (NCBI Blast).

**Table S1** Primer sequences used in qPCR

| Gene name    | Primer sequences                                                                   |
|--------------|------------------------------------------------------------------------------------|
| <i>JAZ8</i>  | forward 5'-TGTGTTTTCTTCAGATGTTACCC-3'<br>reverse 5'-TCTCTGCTTGCATCGATATT-3'        |
| <i>JAZ10</i> | forward 5'-ATCCCGATTTCTCCGGTCCA-3'<br>reverse 5'-ACTTTCTCCTTGCATGGGAAGA-3'         |
| <i>OPR3</i>  | forward 5'-GCATGGAAGCAAGTTGTGGAAGCA-3'<br>reverse 5'-CATGCGCCCCGTGGATCTCAAT-3'     |
| <i>AOS</i>   | forward 5'-GCGACGAGAGATCCGAAGA-3'<br>reverse 5'-CTCGCCACCAAAACAACAAA -3'           |
| <i>UBC21</i> | forward 5'-CAGTCTGTGTGTAGAGCTATCATAGCAT-3'<br>reverse 5'-AGAAGATTCCTGAGTCGCAGTT-3' |

**Movie S1** The  $[Ca^{2+}]_{cyt}$  signals in transgenic *Arabidopsis thaliana* expressing apoaequorine in response to heat wounding in control plants. (a) photograph of plant rosette, (b)  $[Ca^{2+}]_{cyt}$  signal, (c) discharge. The site of heat wounding across a midrib of local leaf is marked with red arrow. The leaf was heat wounded between 00:00-00:10 s.

**Movie S2** The  $[Ca^{2+}]_{cyt}$  signals in transgenic *Arabidopsis thaliana* expressing apoaequorine in response to heat wounding in ketamine-treated plants. (a) photograph of plant rosette, (b)  $[Ca^{2+}]_{cyt}$  signal, (c) discharge. The site of heat wounding across a midrib of local leaf is marked with red arrow. The leaf was heat wounded between 00:00-00:10 s.
